# Supplementary material for: Impact of ChAdOx1 or DNA Prime Vaccination on Magnitude, Breadth, and Focus of MVA-Boosted Immunogen-Specific T Cell Responses
Source: MDPI journal article supplement (doi:10.3390/vaccines12030279), 2024-03-07
Supplement: s1 [file s1]

## Supplementary Data

### **Impact of ChAdOx1 or DNA prime vaccination on magnitude, breadth, and focus of MVA boosted immunogen-specific T cell responses**

Alex Olvera<sup>1,2,3,\*</sup>, Luis Romero-Martin<sup>1,‡</sup>, Bruna Oriol-Tordera<sup>1,ψ</sup>, Miriam Rosas-Umbert<sup>1,#</sup>,  
Tuixent Escribà<sup>1</sup>, Beatriz Mothe<sup>1,2,3,4,5</sup>, Christian Brander<sup>1,2,3,6</sup>

<sup>1</sup> Irsicaixa - AIDS Research Institute, 08916 Badalona, Spain.

<sup>2</sup> Universitat de Vic-Universitat Central de Catalunya (UVic-UCC), Vic, Spain.

<sup>3</sup> CIBERINFEC – ISCIII.

<sup>4</sup> Department of Infectious Diseases, Hospital Germans Trias I Pujol (HUGTIP), Badalona, 08916 Barcelona, Spain

<sup>5</sup> Fundació Lluïta contra les infeccions, Hospital Germans Trias I Pujol (HUGTIP), Badalona, 08916 Barcelona, Spain.

<sup>6</sup> Institució Catalana de Recerca i Estudis Avançats (ICREA), Barcelona, Spain.

Actual address:

‡ Institut Pasteur, Paris, France

luis.romero-martin@pasteur.fr

ψ Almirall, Barcelona, Spain

# Aarhus University, Aarhus, Denmark

Corresponding author:

\* Alex Olvera

aolvera@irsicaixa.es

**Table S1.** Overlapping peptide pools design

| HIV  | Protein (% in HTI)           | Gag (45%) |       |       |                    |    |         |          | Pol (44%)          |         |    |         |         |                    |     | Vif     |         | Nef     |         |       |         |       |
|------|------------------------------|-----------|-------|-------|--------------------|----|---------|----------|--------------------|---------|----|---------|---------|--------------------|-----|---------|---------|---------|---------|-------|---------|-------|
|      | Subunit                      | p17       |       | p24   |                    |    |         | p2p7p1p6 | PRT                |         | RT |         |         | INT                |     | Vif     |         | Nef     |         |       |         |       |
| Pool | ID                           | 1C        | 1D    | 1E    | 1F                 | 1G | 1H      | 1I       | 1J                 | 1K      | 1L | 2A      | 2B      | 2C                 | 2D  | 2E      | 2F      | 2G      |         |       |         |       |
| HTI  | Fragment                     | 1         |       | 2     | 3                  | 4  |         | 5        | 6                  | 7       | 8  |         | 9       | 10                 |     | 11      | 12      | 13      | 14      | 15    | 16      |       |
|      | Length (AA)                  | 78        |       | 14    | 11                 | 60 |         | 14       | 15                 | 27      | 55 |         | 17      | 55                 |     | 34      | 34      | 17      | 26      | 19    | 13      |       |
|      | AA position in HXB2R protein |           | 17-50 | 51-94 | 162-170<br>193-203 |    | 223-245 | 246-282  | 296-308<br>350-363 | 426-452 |    | 101-121 | 122-155 | 189-205<br>365-372 |     | 373-419 | 464-496 | 925-958 | 981-996 | 26-50 | 166-183 | 57-68 |
|      | OLP ID                       | First     | 5     | 16    | 27                 | 35 | 43      | 51       | 61                 | 69      | 78 | 86      | 96      | 107                | 117 | 127     | 132     | 140     | 146     |       |         |       |
|      | Last                         | 15        | 26    | 34    | 42                 | 50 | 60      | 68       | 77                 | 85      | 95 | 106     | 116     | 126                | 131 | 139     | 145     | 147     |         |       |         |       |

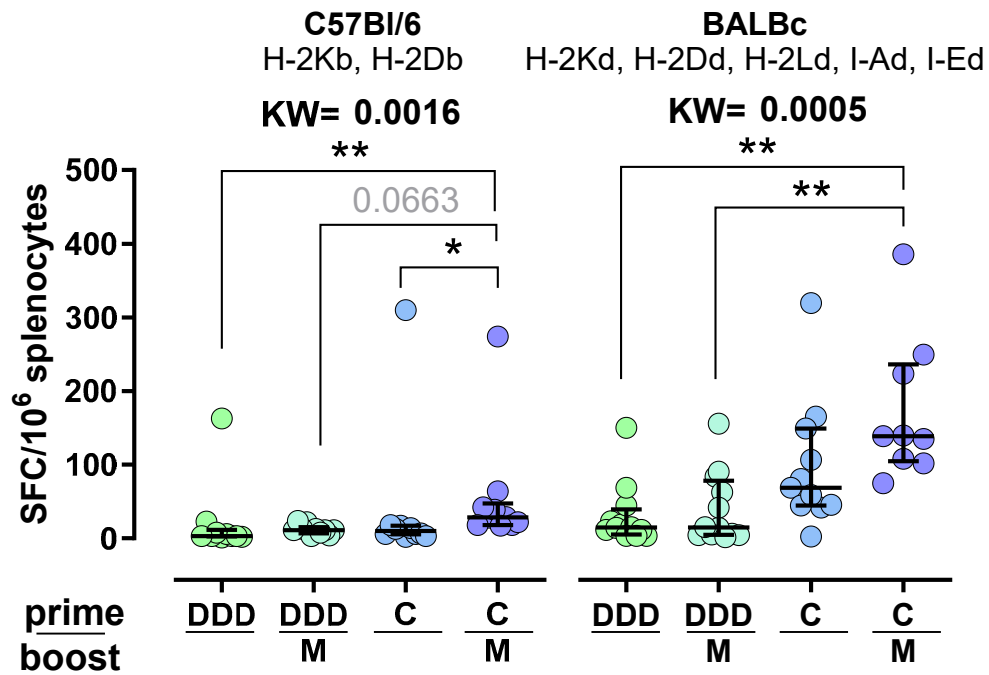

**Figure S1. Mean INF $\gamma$  SFC/10<sup>6</sup> spleen cells background.** Unstimulated negative control triplicates in C57BL/6 and BALBc mice vaccinated with four different prime-boost regimens (DDD, DDDM, C, and CM) are shown. Statistically significant differences ( $p < 0.05$ ) between treatments were tested with the Kruskal-Wallis test with Dunn's correction for multiple comparisons. Significant adjusted Dunn's  $p$  values are shown as \*  $p < 0.05$  by, \*\*  $p < 0.01$  by, \*\*\*  $p < 0.001$ , and \*\*\*\*  $p < 0.0001$ , trends ( $p < 0.1$ ) are indicated by grey numbers.

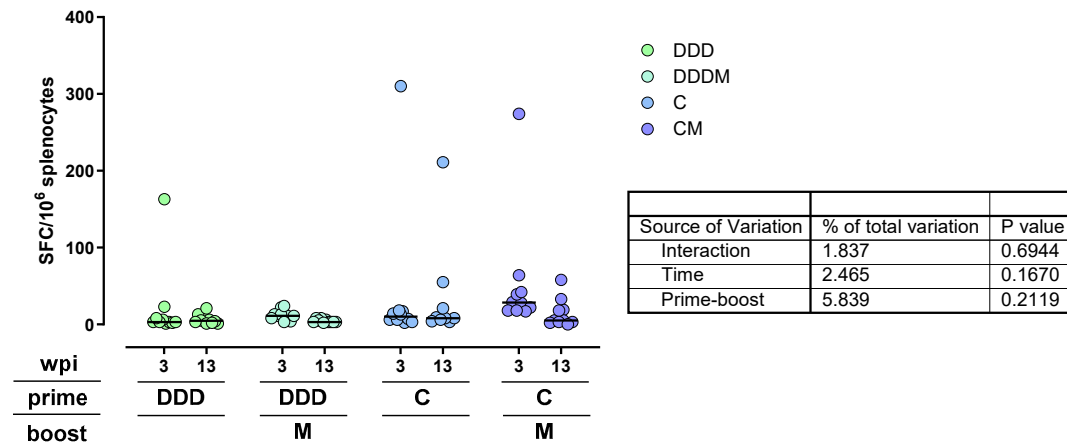

**Figure S2. Mean INF $\gamma$  SFC/106 spleen cells background.** Unstimulated negative control triplicates in C57BL/6 mice vaccinated with four prime-boost regimens (DDD, DDDM, C, and CM) are shown 3- and 13-weeks post-immunization (wpi). Statistically significant differences ( $p < 0.05$ ) between treatments were tested with a 2-way ANOVA with Tukey's correction for multiple comparisons. Significant adjusted Tukey's  $p$  values are shown as \*  $p < 0.05$  by, \*\*  $< 0.01$  by, \*\*\*  $< 0.001$ , and \*\*\*\*  $< 0.0001$ .
